# Supplementary material for: TaqMan qPCR for Quantification of Clonostachys rosea Used as a Biological Control Agent Against Fusarium graminearum
Source: PubMed Central journal article supplement (PMC6646457; doi:10.3389/fmicb.2019.01627), 2019-07-16
Supplement: Data_Sheet_1.pdf [file Data_Sheet_1.pdf]

**Table S1 | Amplification specificity of the TaqMan qPCR – Part 1.** For each DNA extract, two individual reactions were performed using 10 ng of total DNA (5 µl).

*Clonostachys rosea* f. *rosea*: 016; VTT D-97674; CCOS 1864; CCOS 1865; VTT D-161647; VTT D-96593. *Clonostachys rosea* f. *catenulata*: VTT D-97673; VTT D-95548.

*Clonostachys pseudochloroleuca*: CBS 187.94 T. *Clonostachys rhizophaga*: CCOS 1863; CBS 125416. *Clonostachys rogersoniana*: CBS 920.97 T.

“>, E - Late Ct call” = cutoff value for the method.

| Experiment: Specificity <i>C. rosea</i> Selected Filter: FAM (465-510) |       |     |              |        |                     |          |  |
|------------------------------------------------------------------------|-------|-----|--------------|--------|---------------------|----------|--|
| Include                                                                | Color | Pos | Name         | Ct     | Concentration       | Standard |  |
| TRUE                                                                   | 128   | A1  | Std1         | 17.72  | 3.07E+06            | 3700000  |  |
| TRUE                                                                   | 128   | B1  | Std1         | 17.44  | 3.67E+06            | 3700000  |  |
| TRUE                                                                   | 128   | C1  | Std1         | 16.15  | 8.34E+06            | 3700000  |  |
| TRUE                                                                   | 128   | D1  | Std2         | 21.28  | 3.21E+05            | 370000   |  |
| TRUE                                                                   | 128   | E1  | Std2         | 21.08  | 3.63E+05            | 370000   |  |
| TRUE                                                                   | 128   | F1  | Std2         | 20.45  | 5.42E+05            | 370000   |  |
| TRUE                                                                   | 128   | A2  | Std3         | 23.80  | 6.47E+04            | 37000    |  |
| TRUE                                                                   | 128   | G1  | Std3         | 24.50  | 4.13E+04            | 37000    |  |
| TRUE                                                                   | 128   | H1  | Std3         | 24.88  | 3.24E+04            | 37000    |  |
| TRUE                                                                   | 128   | B2  | Std4         | 28.82  | 2.66E+03            | 3700     |  |
| TRUE                                                                   | 128   | C2  | Std4         | 28.24  | 3.84E+03            | 3700     |  |
| TRUE                                                                   | 128   | D2  | Std4         | 28.51  | 3.25E+03            | 3700     |  |
| TRUE                                                                   | 128   | E2  | Std5         | 31.71  | 4.26E+02            | 370      |  |
| TRUE                                                                   | 128   | F2  | Std5         | 31.85  | 3.88E+02            | 370      |  |
| TRUE                                                                   | 128   | G2  | Std5         | 32.02  | 3.49E+02            | 370      |  |
| TRUE                                                                   | 255   | A3  | 016          | 19.93  | 7.52E+05            |          |  |
| TRUE                                                                   | 255   | A4  | 016          | 20.09  | 6.80E+05            |          |  |
| TRUE                                                                   | 255   | A5  | VTT D-95548  | 20.79  | 4.36E+05            |          |  |
| TRUE                                                                   | 255   | A6  | VTT D-95548  | 20.74  | 4.50E+05            |          |  |
| TRUE                                                                   | 65280 | A7  | VTT D-82182  |        |                     |          |  |
| TRUE                                                                   | 65280 | A8  | VTT D-82182  |        |                     |          |  |
| TRUE                                                                   | 65280 | A9  | VTT E-93497  |        |                     |          |  |
| TRUE                                                                   | 65280 | A10 | VTT E-93497  |        |                     |          |  |
| TRUE                                                                   | 65280 | A11 | 1145         |        |                     |          |  |
| TRUE                                                                   | 65280 | A12 | 1145         |        |                     |          |  |
| TRUE                                                                   | 255   | B3  | VTT D-161647 | 20.22  | 6.26E+05            |          |  |
| TRUE                                                                   | 255   | B4  | VTT D-161647 | 20.33  | 5.83E+05            |          |  |
| TRUE                                                                   | 65280 | B5  | VTT D-95470  |        |                     |          |  |
| TRUE                                                                   | 65280 | B6  | VTT D-95470  |        |                     |          |  |
| TRUE                                                                   | 65280 | B7  | VTT D-80141  |        |                     |          |  |
| TRUE                                                                   | 65280 | B8  | VTT D-80141  |        |                     |          |  |
| TRUE                                                                   | 65280 | B9  | VTT D-131555 |        |                     |          |  |
| TRUE                                                                   | 65280 | B10 | VTT D-131555 |        |                     |          |  |
| TRUE                                                                   | 65280 | B11 | VTT D-071272 |        |                     |          |  |
| TRUE                                                                   | 65280 | B12 | VTT D-071272 |        |                     |          |  |
| TRUE                                                                   | 255   | C3  | CCOS 1865    | 20.08  | 6.84E+05            |          |  |
| TRUE                                                                   | 255   | C4  | CCOS 1865    | 20.10  | 6.76E+05            |          |  |
| TRUE                                                                   | 255   | C5  | CBS 125416   | 21.20  | 3.36E+05            |          |  |
| TRUE                                                                   | 255   | C6  | CBS 125416   | 21.22  | 3.32E+05            |          |  |
| TRUE                                                                   | 65280 | C7  | VTT D-82087  |        |                     |          |  |
| TRUE                                                                   | 65280 | C8  | VTT D-82087  |        |                     |          |  |
| TRUE                                                                   | 65280 | C9  | VTT D-94433  |        |                     |          |  |
| TRUE                                                                   | 65280 | C10 | VTT D-94433  |        |                     |          |  |
| TRUE                                                                   | 65280 | C11 | VTT D-161648 |        |                     |          |  |
| TRUE                                                                   | 255   | C12 | VTT D-161648 | >35.00 | >, E - Late Ct call |          |  |

|      |       |     |              |        |                     |
|------|-------|-----|--------------|--------|---------------------|
| TRUE | 255   | D3  | CCOS 1864    | 20.37  | 5.70E+05            |
| TRUE | 255   | D4  | CCOS 1864    | 20.44  | 5.45E+05            |
| TRUE | 255   | D5  | CBS 187.94 T | 21.37  | 3.01E+05            |
| TRUE | 255   | D6  | CBS 187.94 T | 21.14  | 3.49E+05            |
| TRUE | 65280 | D7  | VTT D-77057  |        |                     |
| TRUE | 65280 | D8  | VTT D-77057  |        |                     |
| TRUE | 65280 | D9  | VTT D-80148  |        |                     |
| TRUE | 65280 | D10 | VTT D-80148  |        |                     |
| TRUE | 65280 | D11 | VTT D-131559 |        |                     |
| TRUE | 65280 | D12 | VTT D-131559 |        |                     |
| TRUE | 255   | E3  | CCOS 1863    | 20.66  | 4.75E+05            |
| TRUE | 255   | E4  | CCOS 1863    | 20.89  | 4.09E+05            |
| TRUE | 65280 | E5  | CBS 920.97 T |        |                     |
| TRUE | 65280 | E6  | CBS 920.97 T |        |                     |
| TRUE | 65280 | E7  | VTT D-96653  |        |                     |
| TRUE | 65280 | E8  | VTT D-96653  |        |                     |
| TRUE | 65280 | E9  | VTT D-72014  |        |                     |
| TRUE | 65280 | E10 | VTT D-72014  |        |                     |
| TRUE | 65280 | E11 | VTT D-80134  |        |                     |
| TRUE | 65280 | E12 | VTT D-80134  |        |                     |
| TRUE | 255   | F3  | VTT D-97674  | 21.48  | 2.81E+05            |
| TRUE | 255   | F4  | VTT D-97674  | 21.51  | 2.76E+05            |
| TRUE | 65280 | F5  | CBS 121292   |        |                     |
| TRUE | 65280 | F6  | CBS 121292   |        |                     |
| TRUE | 65280 | F7  | VTT D-76039  |        |                     |
| TRUE | 65280 | F8  | VTT D-76039  |        |                     |
| TRUE | 65280 | F9  | VTT D-03931  |        |                     |
| TRUE | 65280 | F10 | VTT D-03931  |        |                     |
| TRUE | 65280 | F11 | VTT D-99750  |        |                     |
| TRUE | 65280 | F12 | VTT D-99750  |        |                     |
| TRUE | 255   | G3  | VTT D-96593  | 21.51  | 2.76E+05            |
| TRUE | 255   | G4  | VTT D-96593  | 22.02  | 2.00E+05            |
| TRUE | 65280 | G5  | 2113         |        |                     |
| TRUE | 65280 | G6  | 2113         |        |                     |
| TRUE | 65280 | G7  | VTT D-94425  |        |                     |
| TRUE | 65280 | G8  | VTT D-94425  |        |                     |
| TRUE | 65280 | G9  | 11132        |        |                     |
| TRUE | 65280 | G10 | 11132        |        |                     |
| TRUE | 65280 | G11 | VTT D-76046  |        |                     |
| TRUE | 65280 | G12 | VTT D-76046  |        |                     |
| TRUE | 65280 | H2  | -            | -      | -                   |
| TRUE | 255   | H3  | VTT D-97673  | 21.17  | 3.43E+05            |
| TRUE | 255   | H4  | VTT D-97673  | 21.12  | 3.53E+05            |
| TRUE | 65280 | H5  | 335          |        |                     |
| TRUE | 65280 | H6  | 335          |        |                     |
| TRUE | 65280 | H7  | VTT E-78076  |        |                     |
| TRUE | 65280 | H8  | VTT E-78076  |        |                     |
| TRUE | 65280 | H9  | VTT D-76038  |        |                     |
| TRUE | 65280 | H10 | VTT D-76038  |        |                     |
| TRUE | 65280 | H11 | Water        |        |                     |
| TRUE | 255   | H12 | Water        | >35.00 | >, E - Late Ct call |

**Table S1 | Amplification specificity of the TaqMan qPCR – Part 2.** For each DNA extract, two individual reactions were performed using 10 ng of total DNA (5 µl).

*Clonostachys byssicola*: CBS 364.78. “>, E - Late Ct call” = cutoff value for the method.

| Experiment: Specificity <i>C. rosea</i> Selected Filter: FAM (465-510) |       |     |                           |        |                     |          |
|------------------------------------------------------------------------|-------|-----|---------------------------|--------|---------------------|----------|
| Include                                                                | Color | Pos | Name                      | Ct     | Concentration       | Standard |
| TRUE                                                                   | 128   | A1  | Std1                      | 17.15  | 2.51E+06            | 3700000  |
| TRUE                                                                   | 128   | B1  | Std1                      | 16.33  | 3.93E+06            | 3700000  |
| TRUE                                                                   | 128   | C1  | Std1                      | 15.11  | 7.71E+06            | 3700000  |
| TRUE                                                                   | 128   | D1  | Std2                      | 20.01  | 5.19E+05            | 370000   |
| TRUE                                                                   | 128   | E1  | Std2                      | 20.87  | 3.24E+05            | 370000   |
| TRUE                                                                   | 128   | F1  | Std2                      | 21.74  | 2.01E+05            | 370000   |
| TRUE                                                                   | 128   | A2  | Std3                      | 24.69  | 3.98E+04            | 37000    |
| TRUE                                                                   | 128   | G1  | Std3                      | 24.50  | 4.40E+04            | 37000    |
| TRUE                                                                   | 128   | H1  | Std3                      | 24.84  | 3.66E+04            | 37000    |
| TRUE                                                                   | 128   | B2  | Std4                      | 24.57  | 4.24E+04            | 3700     |
| TRUE                                                                   | 128   | C2  | Std4                      | 28.32  | 5.38E+03            | 3700     |
| TRUE                                                                   | 128   | D2  | Std4                      | 28.55  | 4.75E+03            | 3700     |
| TRUE                                                                   | 128   | E2  | Std5                      | 31.58  | 8.97E+02            | 370      |
| TRUE                                                                   | 128   | F2  | Std5                      | 31.98  | 7.21E+02            | 370      |
| TRUE                                                                   | 128   | G2  | Std5                      | 32.04  | 6.96E+02            | 370      |
| TRUE                                                                   | 65280 | A3  | VTT D-00808               |        |                     |          |
| TRUE                                                                   | 65280 | A4  | VTT D-00808               |        |                     |          |
| TRUE                                                                   | 255   | A5  | CBS 364.78                | 30.48  | 1.65E+03            |          |
| TRUE                                                                   | 255   | E5  | CBS 364.78                | 30.59  | 1.55E+03            |          |
| TRUE                                                                   | 255   | B5  | CBS 364.78 (1:10)         | 34.10  | 2.25E+02            |          |
| TRUE                                                                   | 255   | F5  | CBS 364.78 (1:10)         | >35.00 | >, E - Late Ct call |          |
| TRUE                                                                   | 255   | C5  | CBS 364.78 (1:100)        | >35.00 | >, E - Late Ct call |          |
| TRUE                                                                   | 255   | G5  | CBS 364.78 (1:100)        | >35.00 | >, E - Late Ct call |          |
| TRUE                                                                   | 65280 | C3  | VTT D-76024               |        |                     |          |
| TRUE                                                                   | 65280 | C4  | VTT D-76024               |        |                     |          |
| TRUE                                                                   | 65280 | B3  | VTT D-94422               |        |                     |          |
| TRUE                                                                   | 65280 | B4  | VTT D-94422               |        |                     |          |
| TRUE                                                                   | 65280 | D3  | VTT D-79121               |        |                     |          |
| TRUE                                                                   | 65280 | D4  | VTT D-79121               |        |                     |          |
| TRUE                                                                   | 65280 | E3  | <i>Hordeum vulgare</i> L. |        |                     |          |
| TRUE                                                                   | 65280 | E4  | <i>Hordeum vulgare</i> L. |        |                     |          |
| TRUE                                                                   | 65280 | F3  | VTT D-051089T             |        |                     |          |
| TRUE                                                                   | 255   | F4  | VTT D-051089T             | >35.00 | >, E - Late Ct call |          |
| TRUE                                                                   | 65280 | G3  | VTT D-82082               |        |                     |          |
| TRUE                                                                   | 65280 | G4  | VTT D-82082               |        |                     |          |
| TRUE                                                                   | 65280 | H2  | -                         | -      | -                   |          |
| TRUE                                                                   | 65280 | H3  | VTT D-76042               |        |                     |          |
| TRUE                                                                   | 65280 | H4  | VTT D-76042               |        |                     |          |
| TRUE                                                                   | 65280 | D5  | Water                     |        |                     |          |
| TRUE                                                                   | 65280 | H5  | Water                     |        |                     |          |
| TRUE                                                                   | 65280 | B4  | VTT E-90398               |        |                     |          |
| TRUE                                                                   | 65280 | B5  | VTT E-90398               |        |                     |          |
| TRUE                                                                   | 255   | C10 | VTT C-92011               | >35.00 | >, E - Late Ct call |          |
| TRUE                                                                   | 65280 | C11 | VTT C-92011               |        |                     |          |
| TRUE                                                                   | 65280 | H8  | VTT D-03923               |        |                     |          |
| TRUE                                                                   | 65280 | H9  | VTT D-03923               |        |                     |          |
