# Supplementary material for: TaqMan qPCR for Quantification of Clonostachys rosea Used as a Biological Control Agent Against Fusarium graminearum
Source: PubMed Central journal article supplement (PMC6646457; doi:10.3389/fmicb.2019.01627), 2019-07-16
Supplement: Image_4.pdf [file Image_4.pdf]

**A**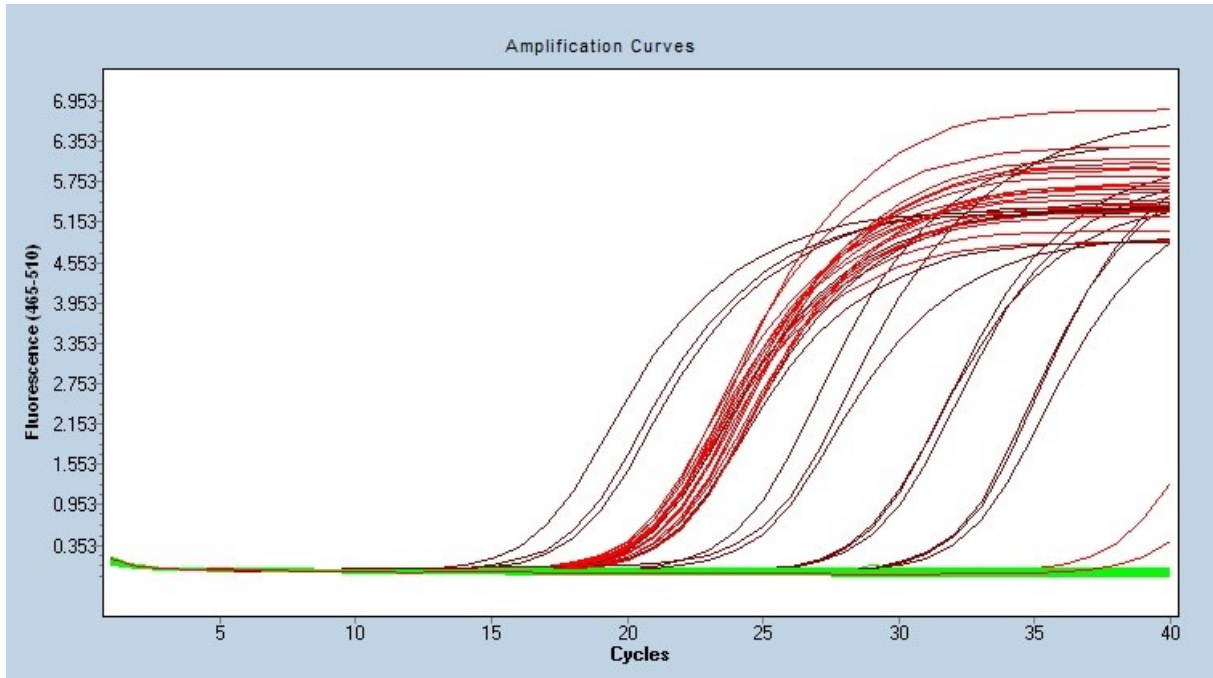**B**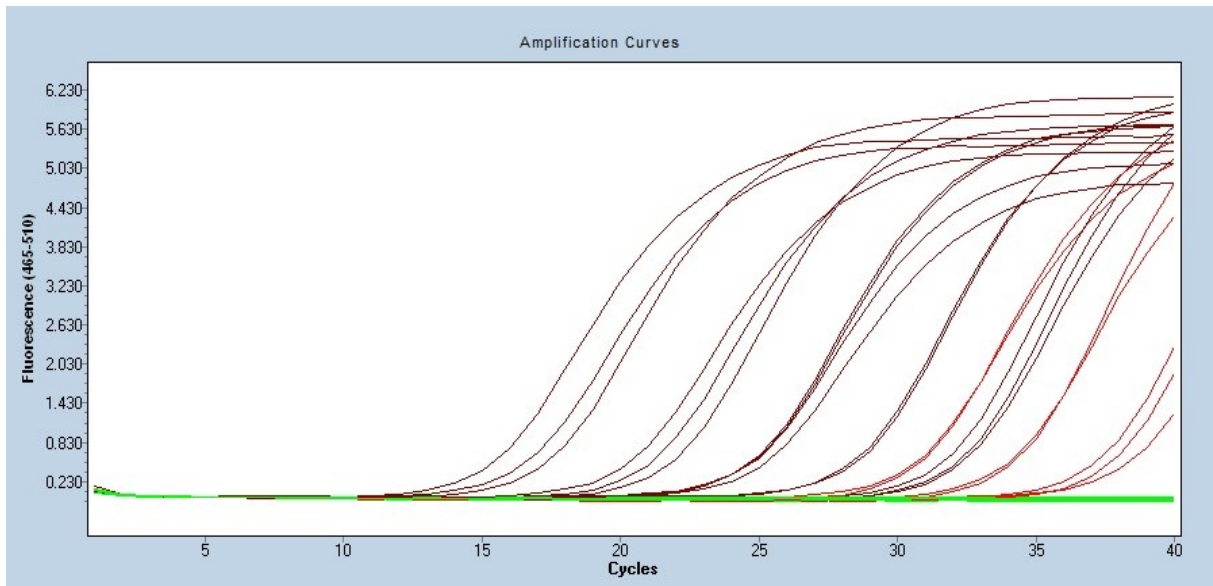

**Figure S4 | Amplification curves of the TaqMan qPCR.** For each DNA extract, two individual reactions were performed using 10 ng of total DNA (5  $\mu$ l) and the amplification was examined. (A) Part 1 and (B) Part 2.  $>35.00$  = cutoff value for the method.
